# Supplementary material for: Proteomic Analysis of the Spinophilin Interactome in Rodent Striatum Following Psychostimulant Sensitization
Source: MDPI journal article supplement (doi:10.3390/proteomes6040053), 2018-12-17
Supplement: s1 [file s1]

|       |     |                                                               |     |
|-------|-----|---------------------------------------------------------------|-----|
| Human | 1   | MMKTEPRGPGGPLRSASPHRSAYEAGIQALKPPDAPGPDEAPKGAHHKKYGSNVHRIKSM  | 60  |
| Mouse | 1   | MMKTEPRGPGGPLRSASPHRSAYEAGIQALKPPDAPGPDEAPK AHHKKYGSNVHRIKSM  | 60  |
| Human | 61  | FLQMGTTAGPSGEAGGGAGLAEAPRASERGVRSLPRASSLNENVVDHSALLKLGTSVSER  | 120 |
| Mouse | 61  | FLQMGTTAGP GEAGGGAG+AEAPRAS+RGVRSLPRASSLNENVVDHSALLKLGTSVSER  | 120 |
| Human | 121 | VSRFDSKPAPSAQAPPPPHPPSRLQETRKLFRSAPAAAGGDKEAAARRLLRQERAGLQD   | 180 |
| Mouse | 121 | VSRFDSKPAPSAQAPPPPHPPSRLQETRKLFRS PAA+GGDKEA ARRLRQERAGLQD    | 180 |
| Human | 181 | RKLDVVVRFNGSTEALDKLDADAVSPTVSQLSAVFEKADSRTGLHRGPGLPRAAGVPQVN  | 240 |
| Mouse | 181 | RKLDVVVRFNGSTEALDKLDADAVSPTVSQLSAVFEKADSRTGLHR PG PRAAG PQVN  | 240 |
| Human | 241 | SKLVSKRSRVFQPPPPPPAPSGDAPAEKERCPAGQQPPQHRVAPARPPPKPREVRKIKP   | 300 |
| Mouse | 241 | SKLV+KRSRVFQPPPPPP APSGD EKER P GQQPPQHRVAPARPPPKPREVRKIKP    | 299 |
| Human | 301 | VEVEESGESEAESAPGEVIAEVTVHAALENGSTVATAASPAPEEPKAQAAPEKEAAA-V   | 359 |
| Mouse | 300 | VEVEESGESEAESAPGEVIAEVTVHAALENGST AT ASPAPEEPKA+A PE+EAAA V   | 359 |
| Human | 360 | APPERGVGNRAPDVAPEEVDESKKEDFSEADLVDVSAYSGLGEDSAGSALEEDDEDDEE   | 419 |
| Mouse | 360 | A ERGV NGRAPD+APEEVDESKKEDFSEADLVDVSAYSGLGEDS GSALEEDDE+DEE   | 419 |
| Human | 420 | DGEPPYEPESGCVEIPGLSEEDPAPSRKIHFSSTAPIQVFSTYSNEDYDRRNEDVDPMAA  | 479 |
| Mouse | 420 | DGEPPYEPESGCVEIPGLSEEDPAPSRKIHFSSTAPIQVFSTYSNEDYDRRNEDVDPMAA  | 479 |
| Human | 480 | SAEYELEKRVERLELFPVELEKDSEGLGISIIIGMGAGADMGLEKLGIFVKTVTEGGAAHR | 539 |
| Mouse | 480 | SAEYELEKRVERLELFPVELEKDSEGLGISIIIGMGAGADMGLEKLGIFVKTVTEGGAAHR | 539 |
| Human | 540 | DGRIQVNDLLVEVDGTSLVGVTSQFAASVLRNTKGRVRFMIGRERPGEQSEVAQLIQQTL  | 599 |
| Mouse | 540 | DGRIQVNDLLVEVDGTSLVGVTSQFAASVLRNTKGRVRFMIGRERPGEQSEVAQLIQQTL  | 599 |
| Human | 600 | EQERWQREMMEQRYAQYGEDDEETGEYATDEDEELSPTFPGGEMAIEVFELAENEDALSP  | 659 |
| Mouse | 600 | EQERWQREMMEQRYAQYGEDDEETGEYATDEDEELSPTFPGGEMAIEVFELAENEDALSP  | 659 |
| Human | 660 | VDMEPEKLVHKKFELQIKHAVTEAEIQQLKRKLQSLEQEKGRWRVEKAQLEQSVEENKER  | 719 |
| Mouse | 660 | V+MEPEKLVHKKFELQIKHAVTEAEIQQLKRKLQSLEQEKGRWRVEKAQLEQSVEENKER  | 719 |
| Human | 720 | MEKLEGYWGEAQSLCQAVDEHLRETQAQYQALERKYSKAKRLIKDYQQKEIEFLKKETAQ  | 779 |
| Mouse | 720 | MEKLEGYWGEAQSLCQAVDEHLRETQAQYQALERKYSKAKRLIKDYQQKEIEFLKKETAQ  | 779 |
| Human | 780 | RRVLEESELARKEEMDKLLDKISELEGNLQTLRNSNST                        | 817 |
| Mouse | 780 | RRVLEESELARKEEMDKLLDKISELEGNLQTLRNSNST                        | 817 |
