# Supplementary figures and images for: Proteomic Analysis of the Spinophilin Interactome in Rodent Striatum Following Psychostimulant Sensitization
Source: MDPI journal article supplement (doi:10.3390/proteomes6040053), 2018-12-17

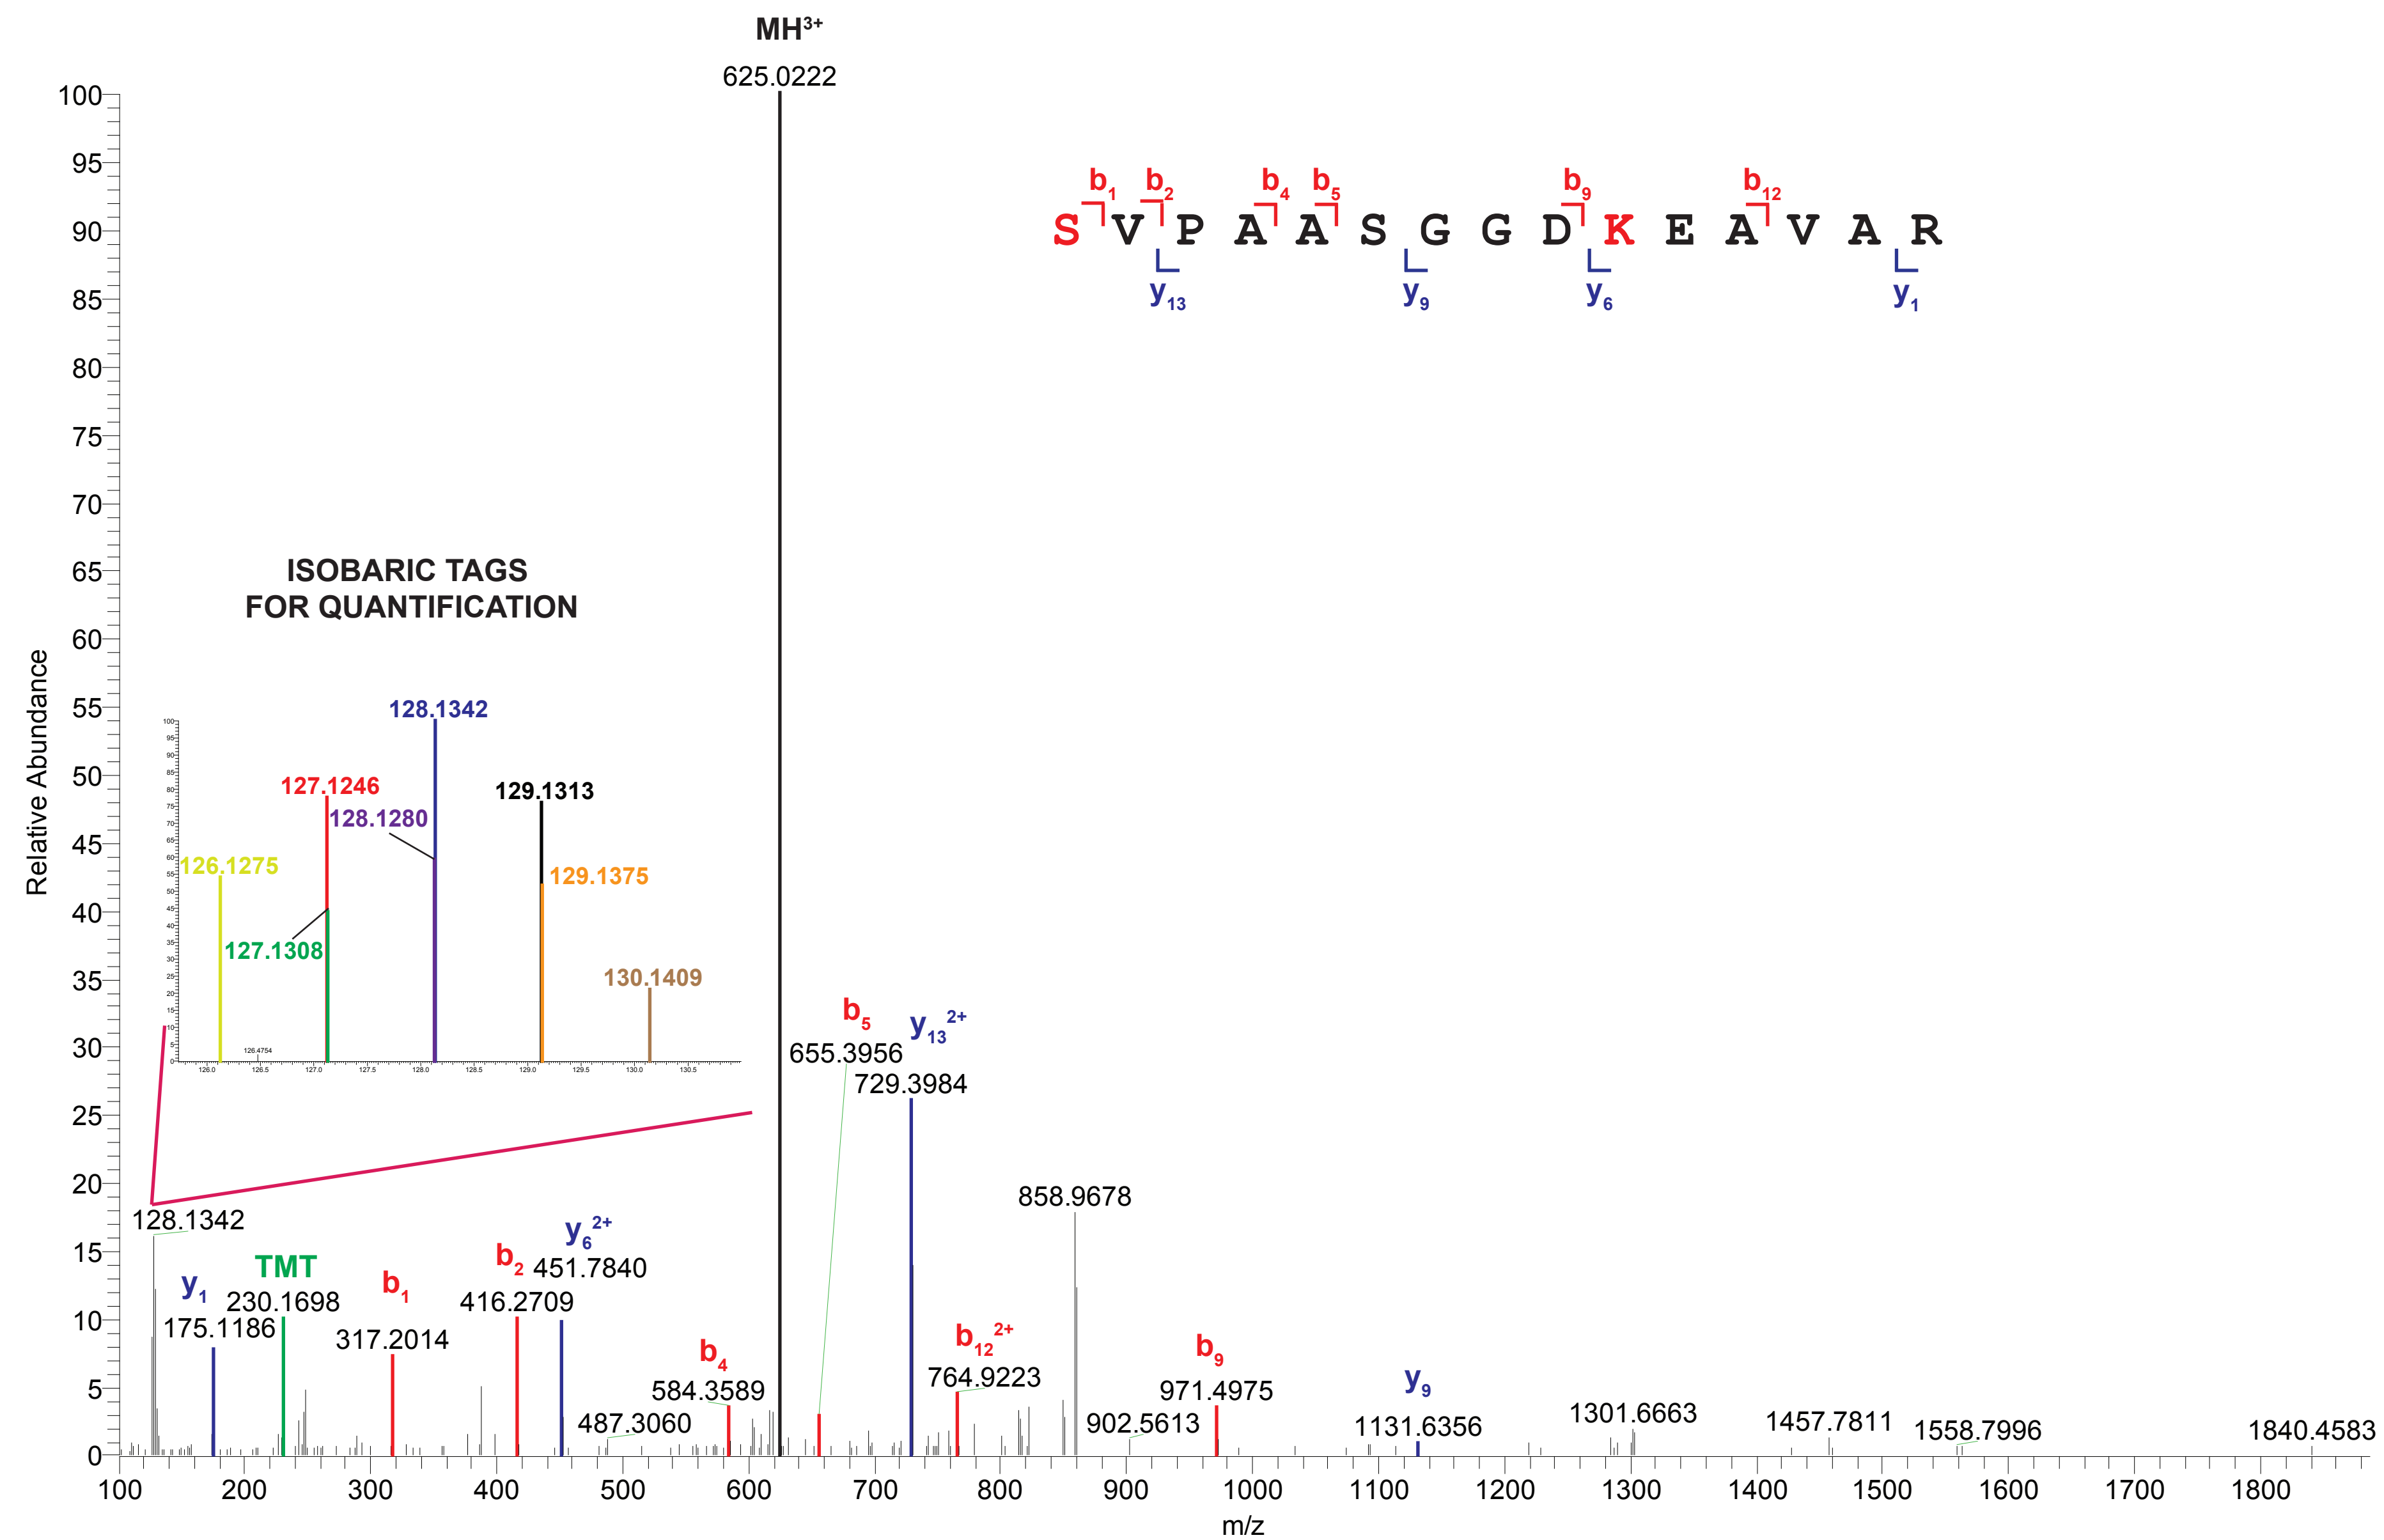

Supplement: s1 [file s1]

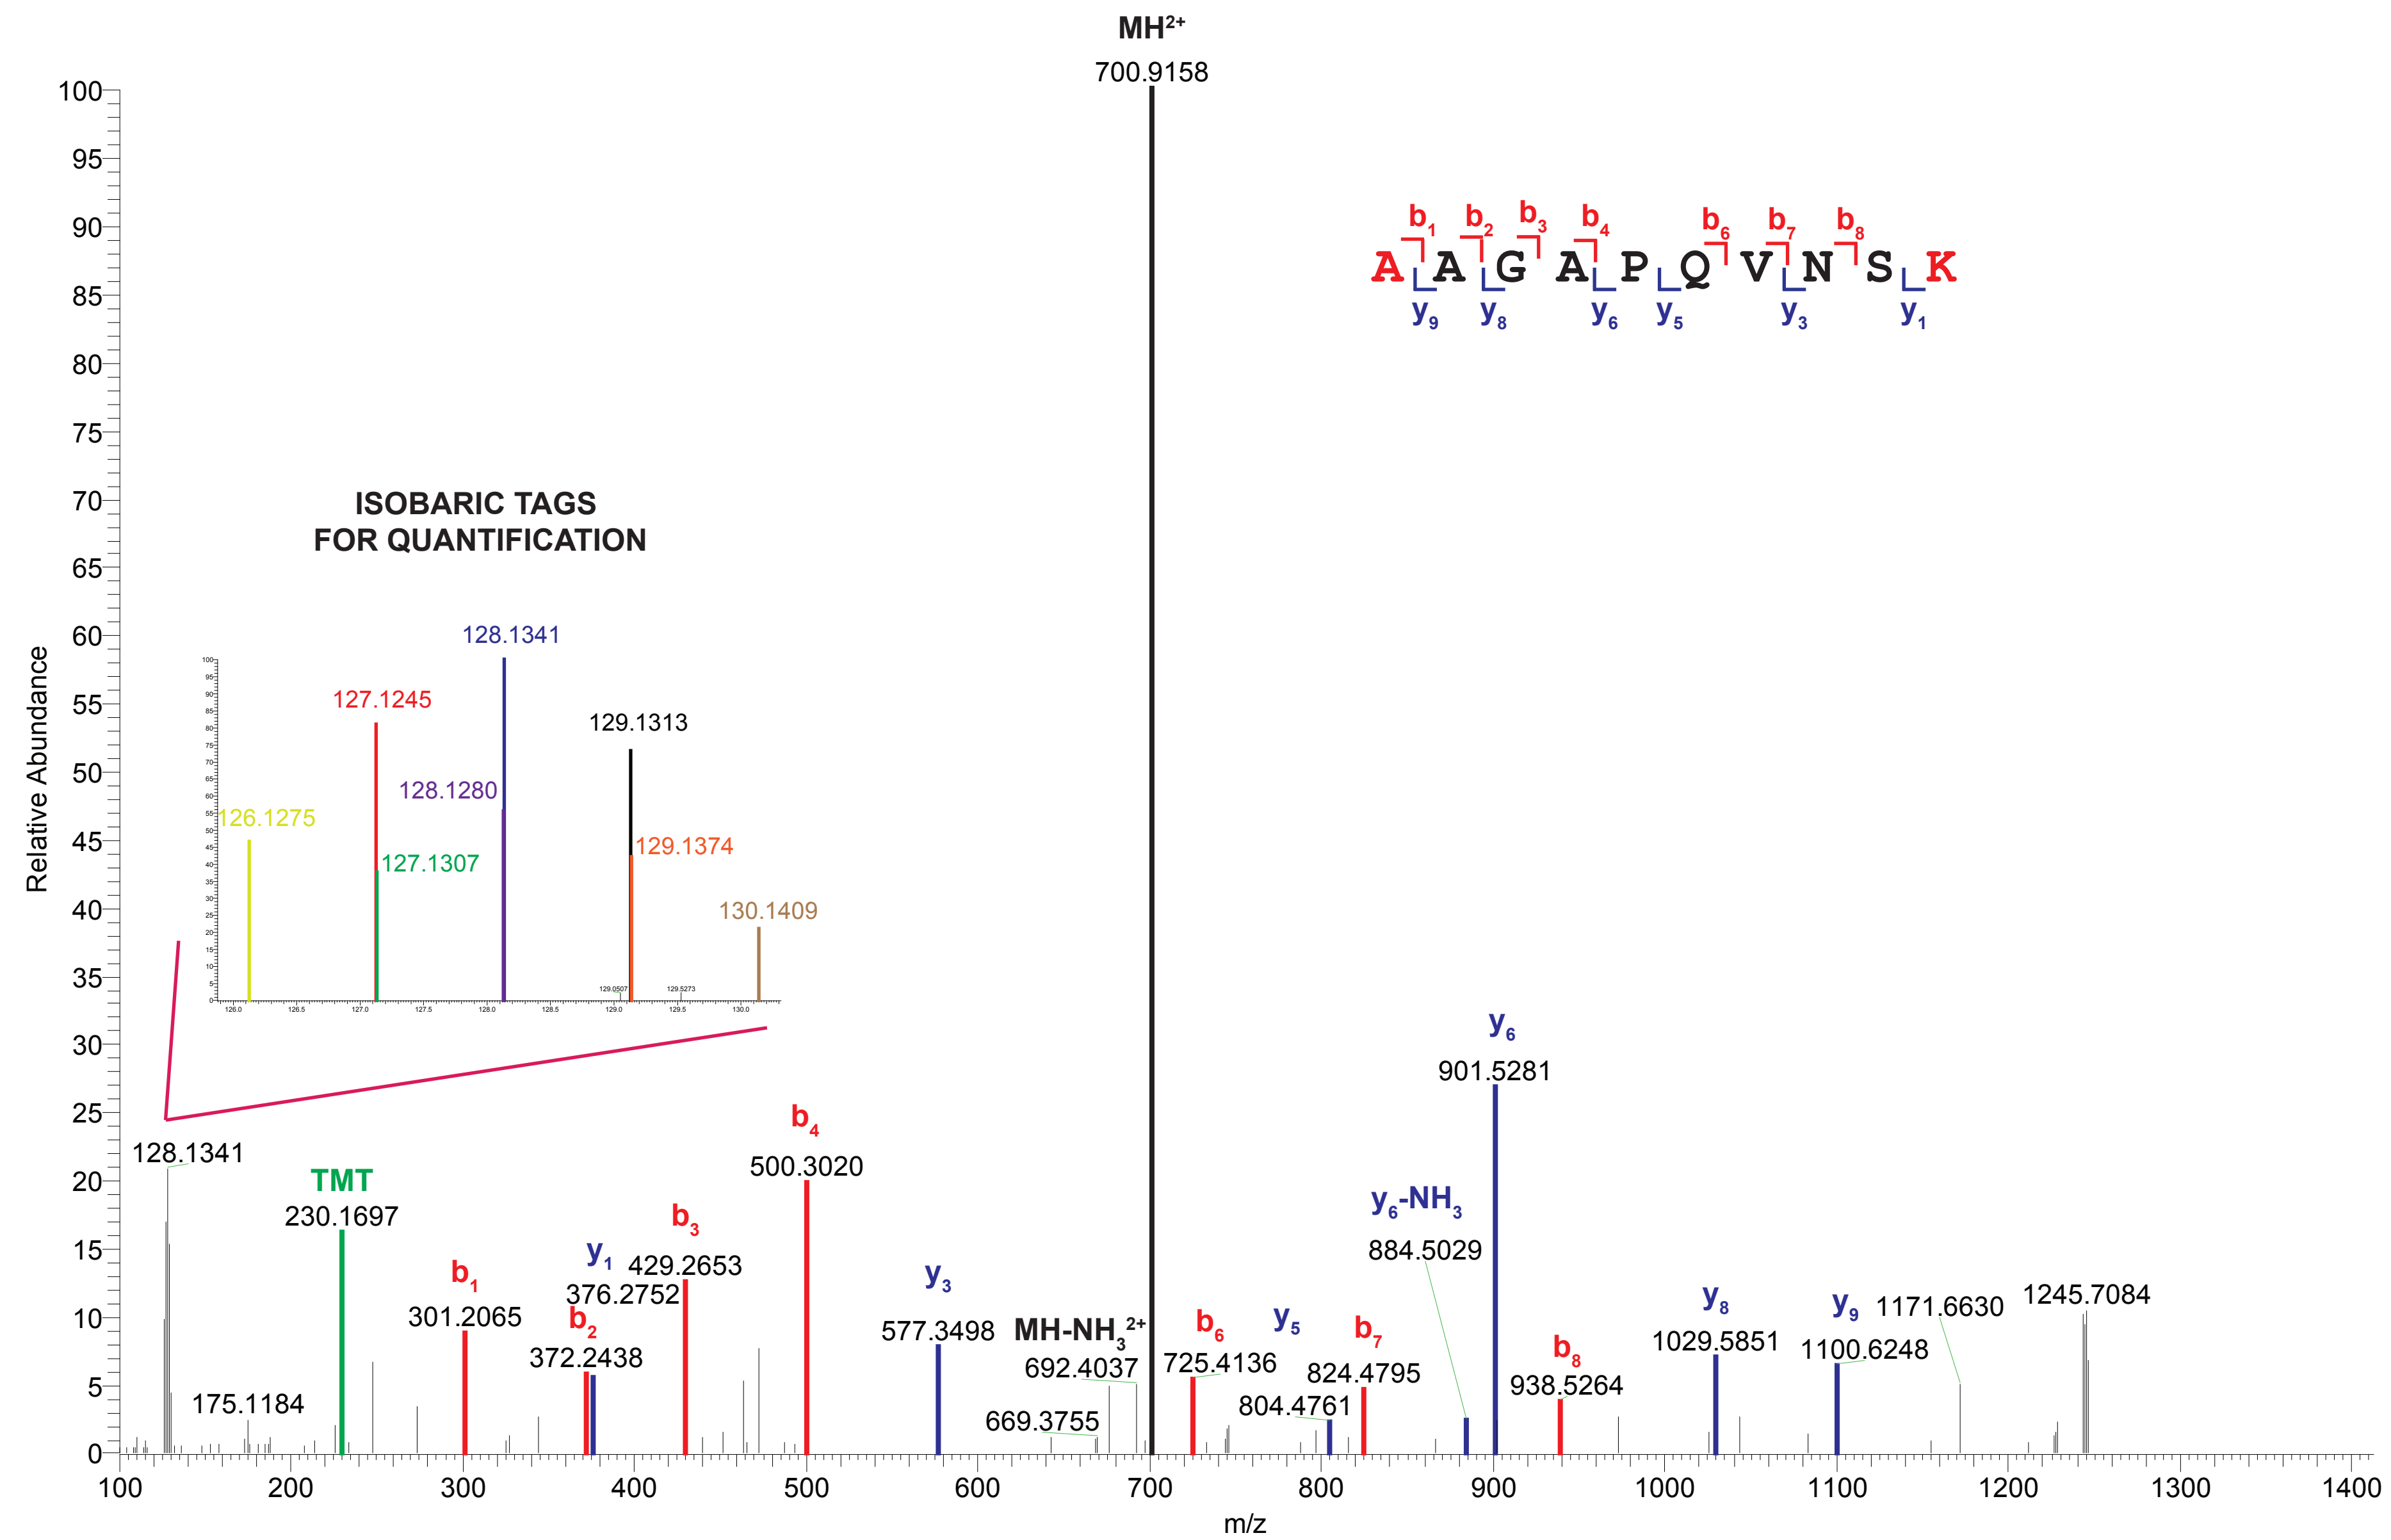

Supplement: s1 [file s1]

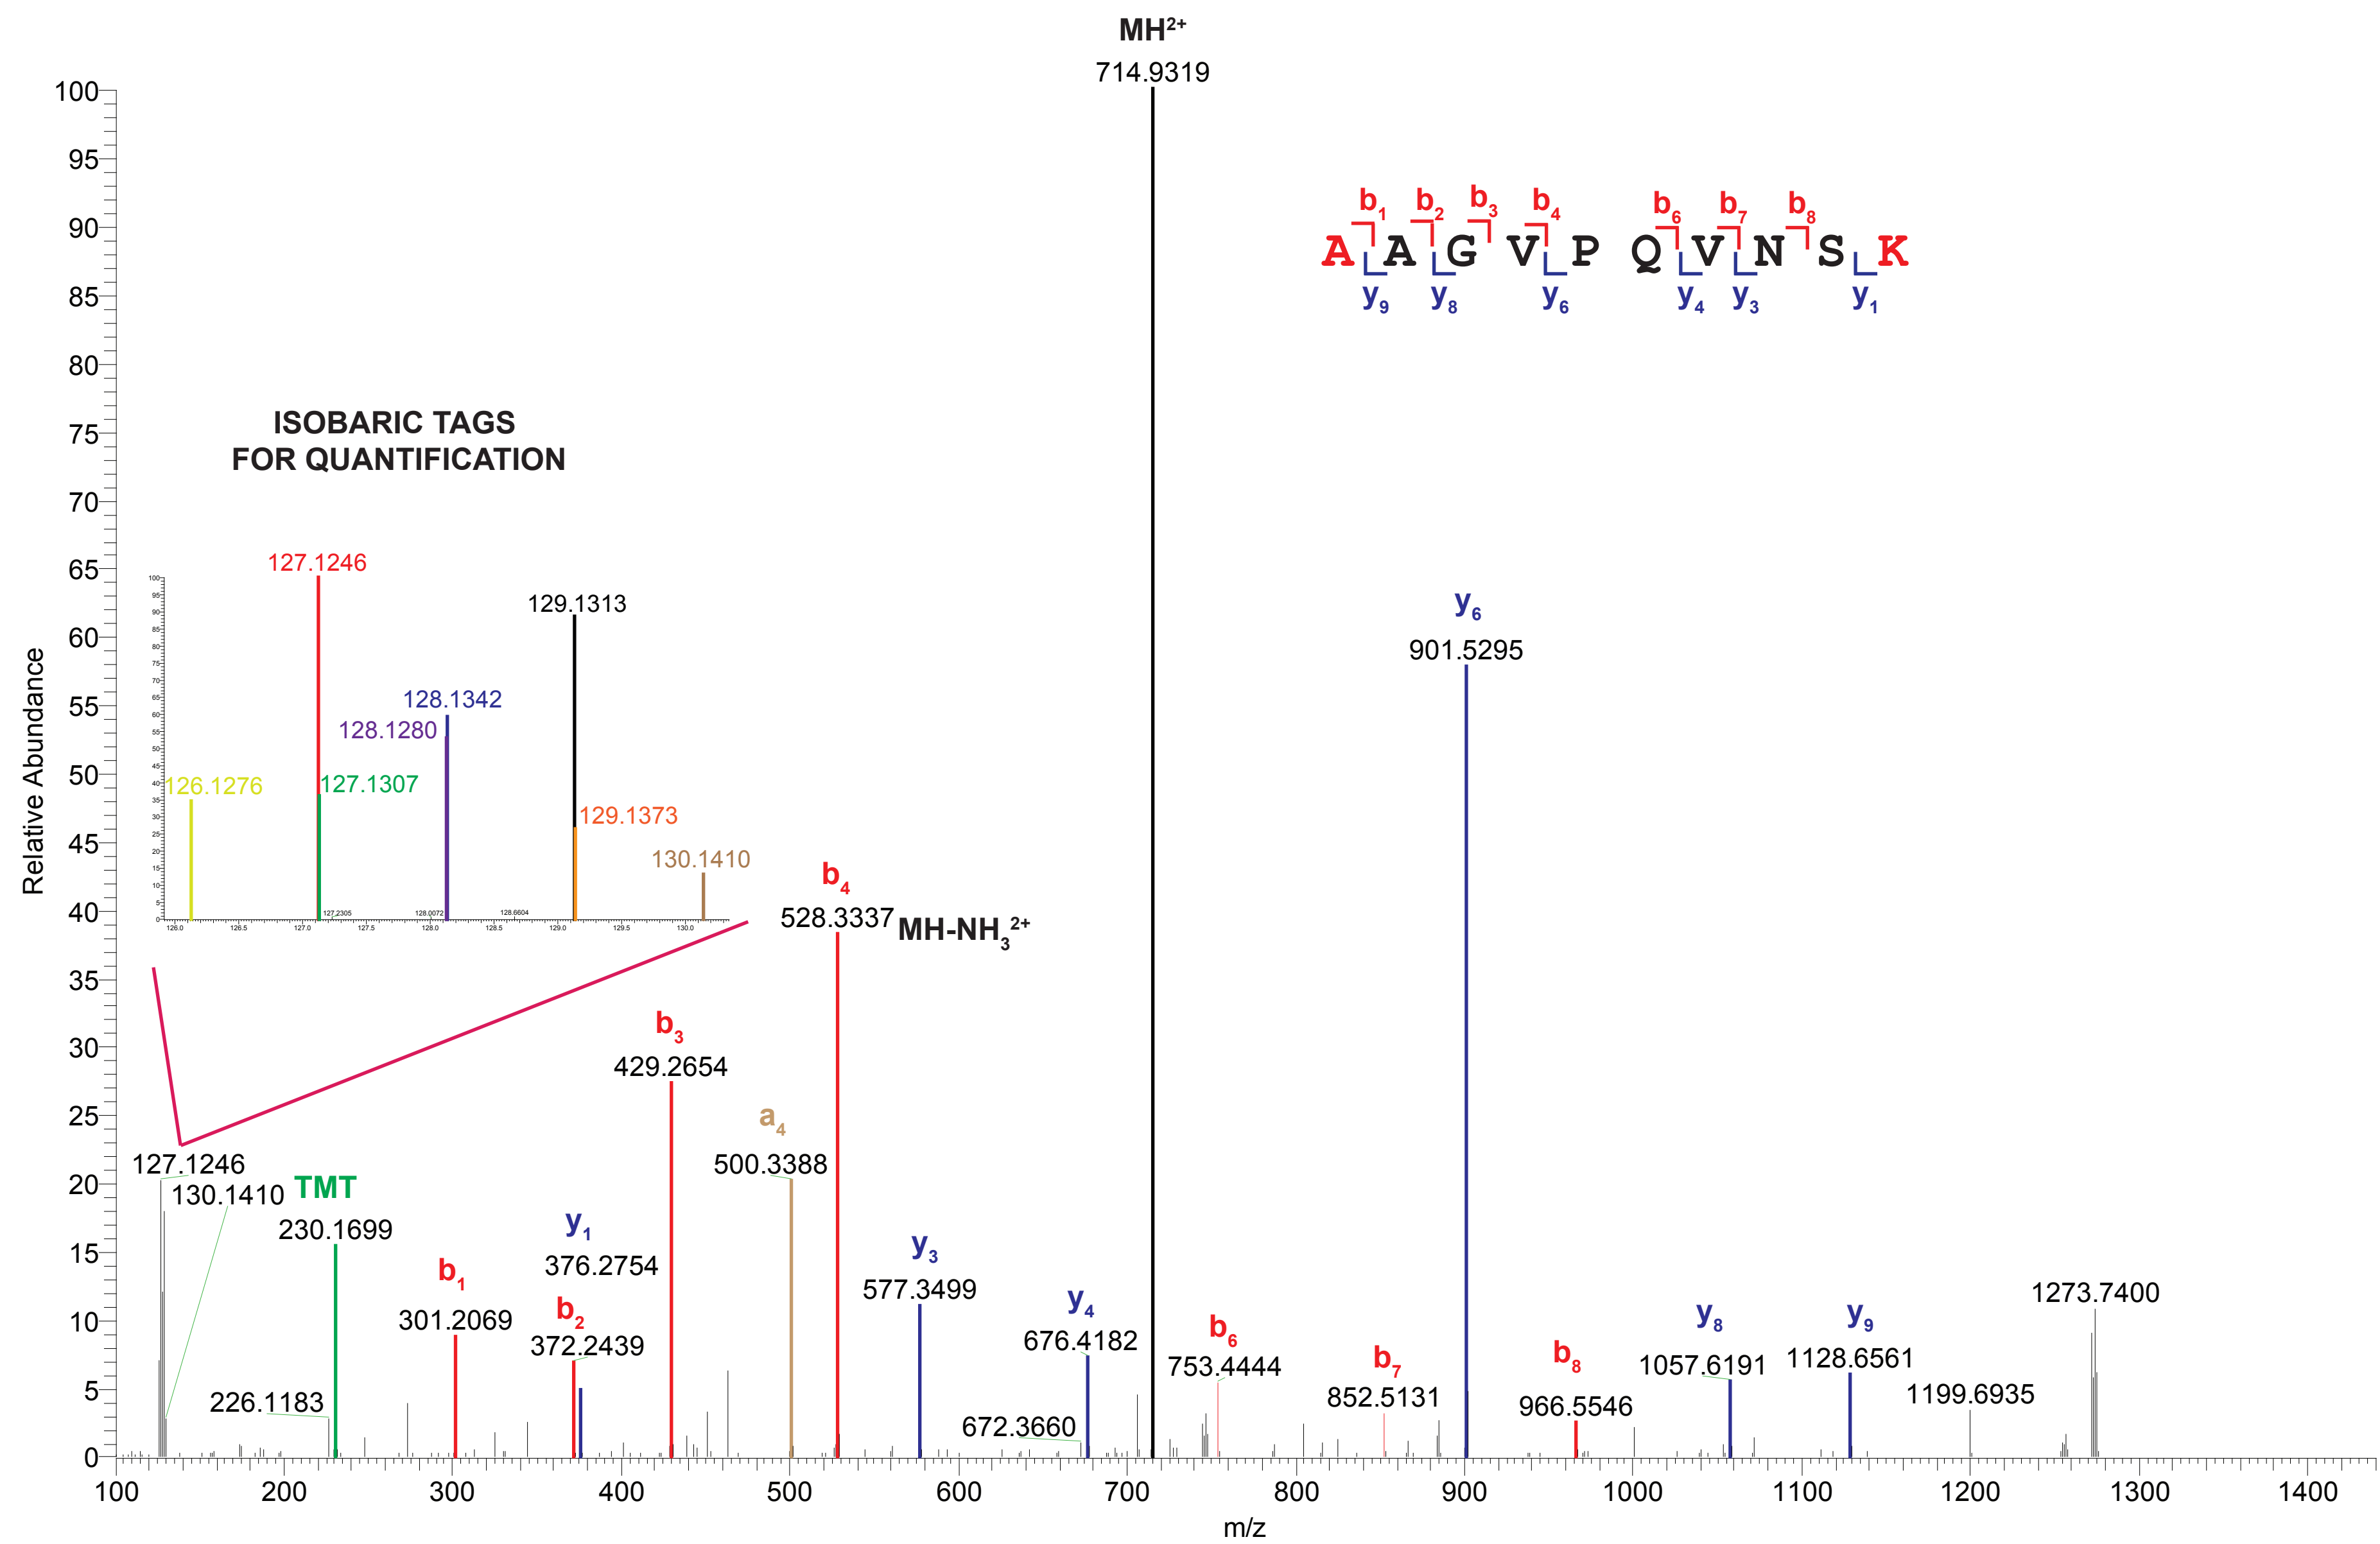

Supplement: s1 [file s1]

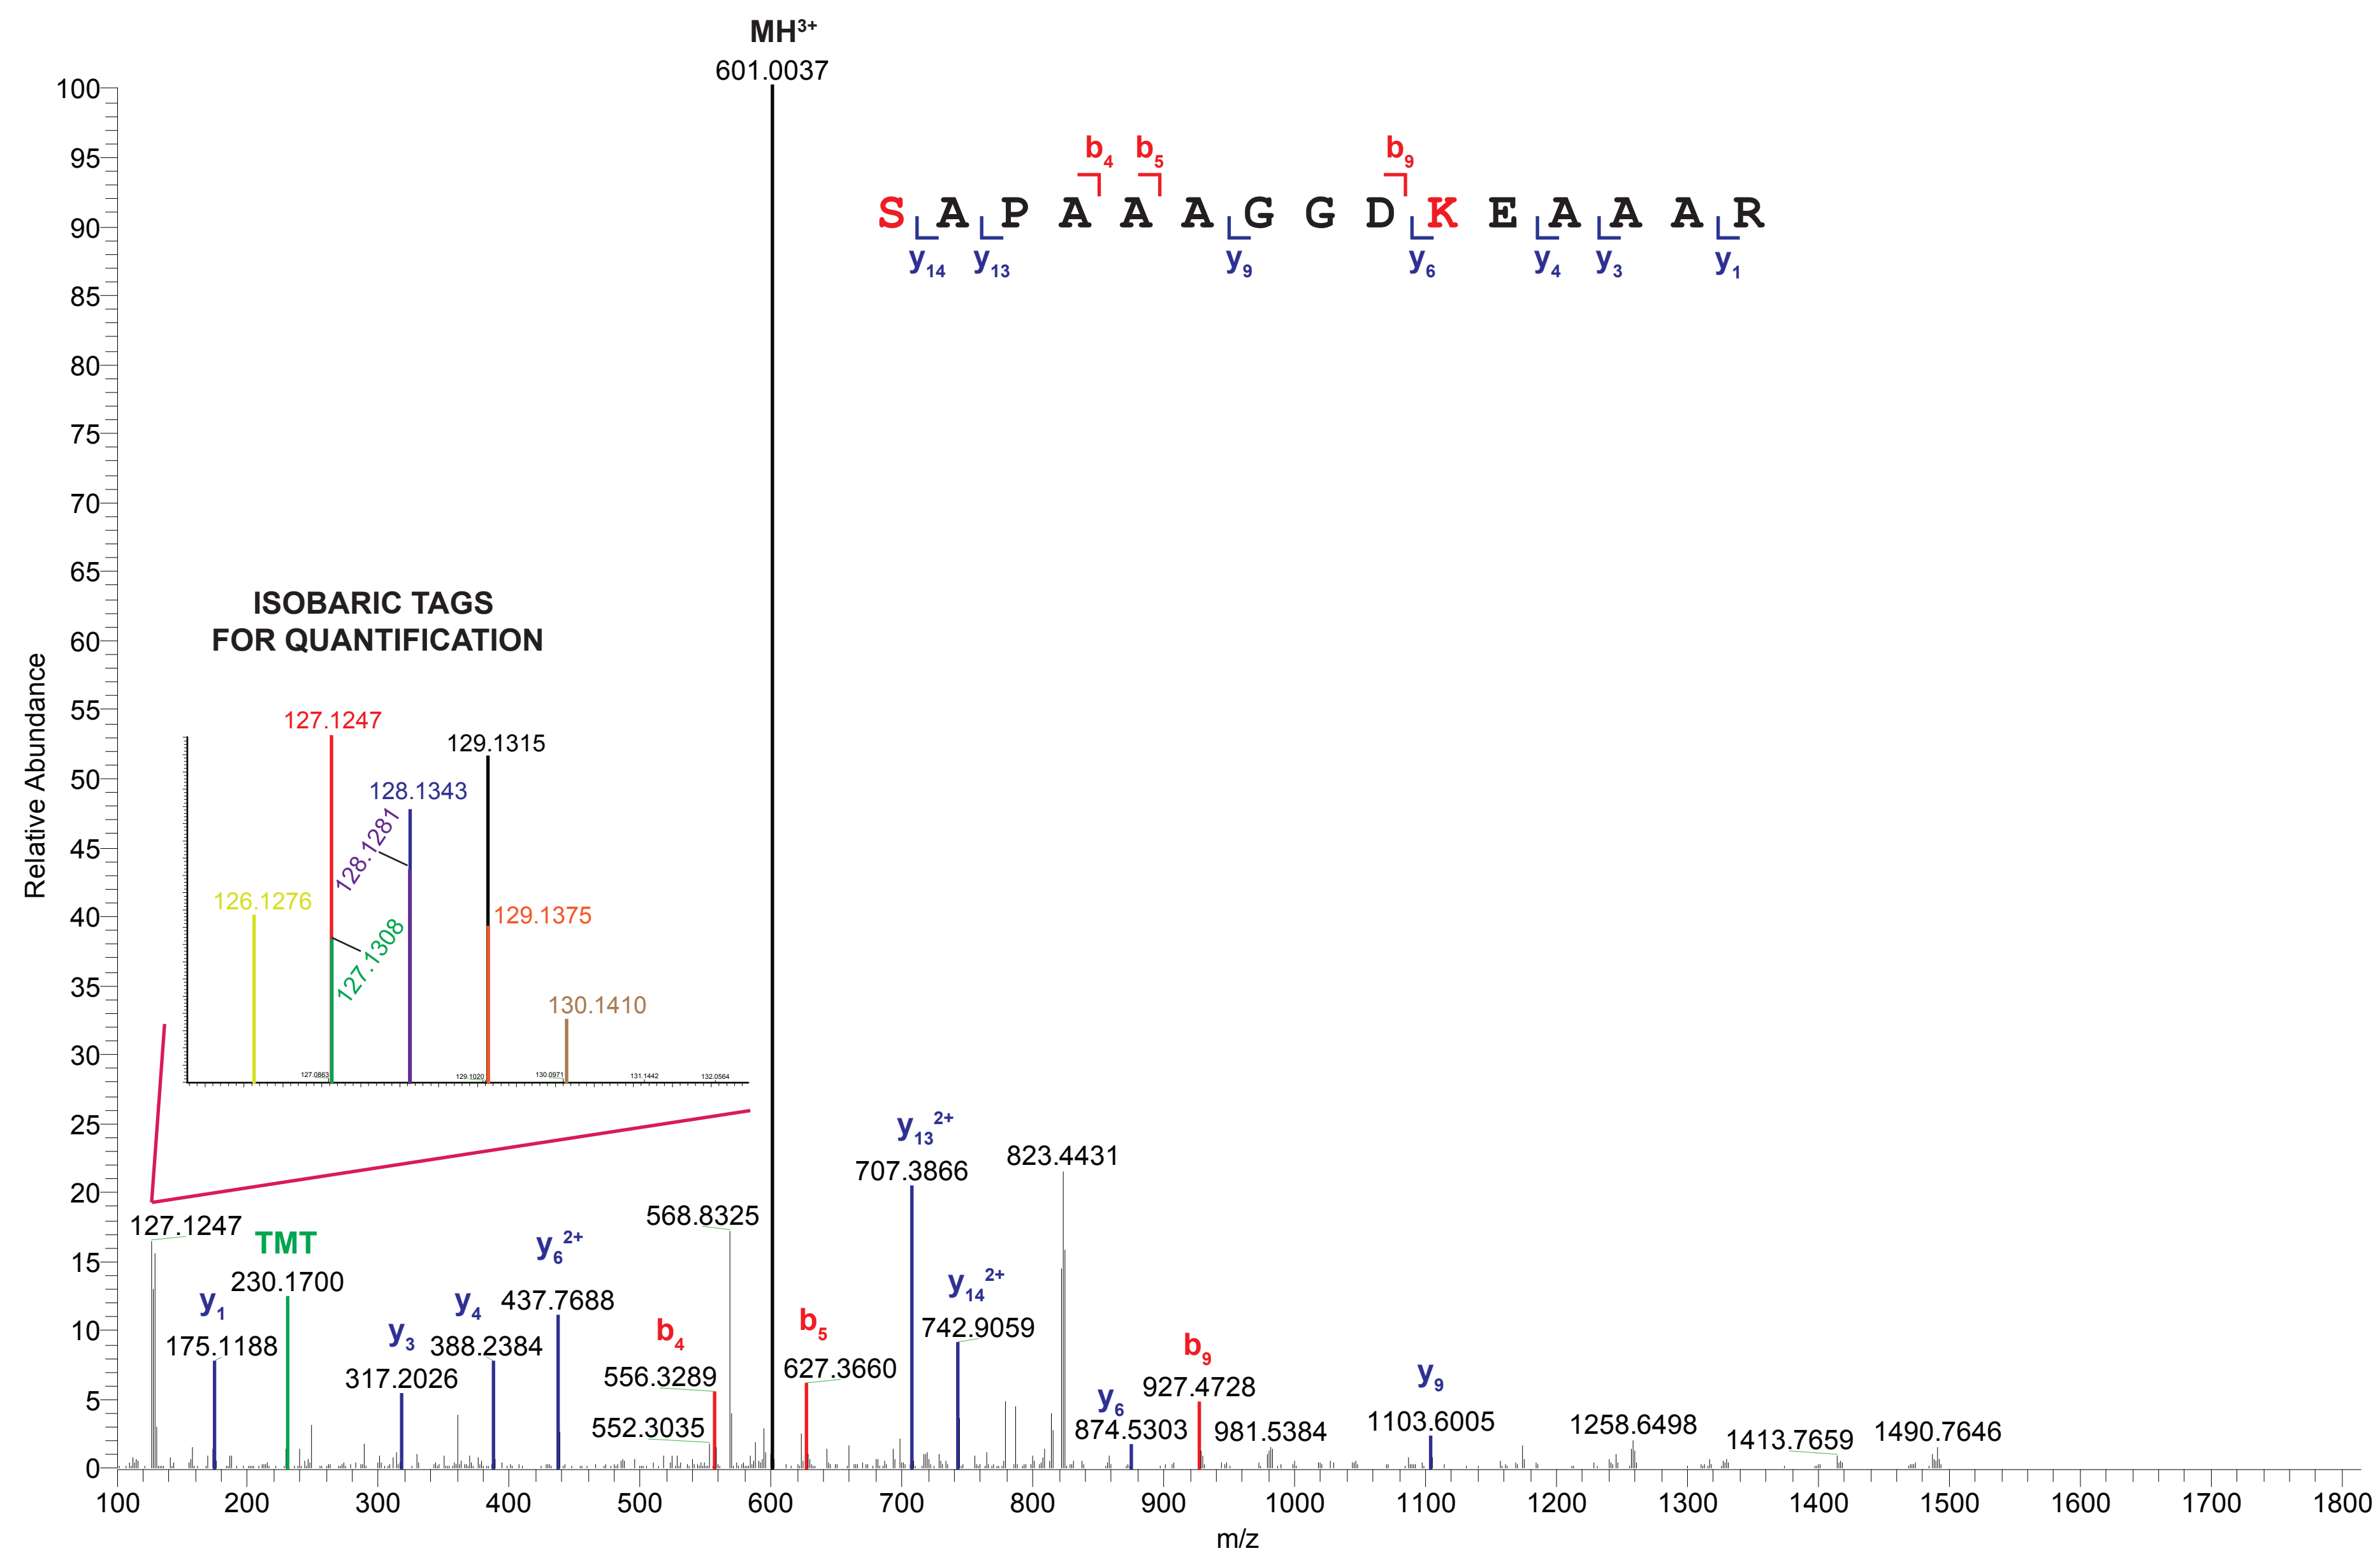

Supplement: s1 [file s1]
